# Supplementary material for: Long-term Outcomes of Stereotactic Body Radiotherapy for Low-Risk and Intermediate-Risk Prostate Cancer
Source: PubMed Central journal article supplement (PMC6484596; doi:10.1001/jamanetworkopen.2018.8006), 2019-02-08
Supplement: jamanetwopen-2-e188006-s001.pdf [file jamanetwopen-2-e188006-s001.pdf]

## Supplementary Online Content

Kishan AU, Dang A, Katz AJ, et al. Long-term outcomes of stereotactic body radiotherapy for low-risk and intermediate-risk prostate cancer. *JAMA Netw Open*. 2019;2(2):e188006. doi:10.1001/jamanetworkopen.2018.8006

**eTable 1.** Specific Planning Considerations for Individual Studies

**eTable 2.** Selected Overview of Toxicity Scales for Grade  $\geq 3$  Toxicity Events

**eTable 3.** Cumulative Incidence or Kaplan-Meier Estimates for Selected End Points

**eTable 4.** Competing Risk Regression Analysis for Predictors of Biochemical Recurrence

**eTable 5.** Cox Proportional Hazards Regression Analysis for Predictors of Biochemical Recurrence

**eTable 6.** Narrative Description of Severe Grade  $\geq 3$  Toxicity Outcomes

**eTable 7.** Multivariable Logistic Regression for Predictors of Late Composite RTOG/CTCAE Grade  $\geq 3$  Toxicity

**eTable 8.** Multivariable Logistic Regression for Predictors of Late Composite RTOG/CTCAE Grade  $\geq 2$  Toxicity

**eTable 9.** Comparative Analysis of Efficacy and Safety of Radiation Treatment Options for Low- and Intermediate-Risk Prostate Cancer: An Analysis of Prospective Data With Long-term Follow-up

**eReferences**

This supplementary material has been provided by the authors to give readers additional information about their work.

**eTable 1.** Specific Planning Considerations for Individual Studies

| Institution or Trial                  | Dose/Fraction                       | Prescription Specification          | Margins                                                                                                                                                  | Planning Technique                                | Image Guidance                                                                             |
|---------------------------------------|-------------------------------------|-------------------------------------|----------------------------------------------------------------------------------------------------------------------------------------------------------|---------------------------------------------------|--------------------------------------------------------------------------------------------|
| Virginia Mason                        | 6·7 Gy x 5                          | 90% of rx to cover 100% of prostate | 4-5 mm from prostate to block edge                                                                                                                       | Six stationary noncoplanar fields                 | Orthogonal imaging to implanted fiducial markers prior to treatment                        |
| Stanford                              | 7·25 Gy x 5                         | 100% of rx to cover 95% of PTV      | 5 mm expansion from prostate, except 3 mm posteriorly                                                                                                    | Noncoplanar fields (robotic gantry)               | Real-time tracking of implanted fiducial markers                                           |
| Flushing                              | 7 Gy x 5 (32%)<br>7·25 Gy x 5 (68%) | 100% of rx to cover 95% of PTV      | 5 mm expansion from prostate, except 3 mm posteriorly. SVs included for lesions at the base                                                              | Noncoplanar fields (robotic gantry)               | Real-time tracking of implanted fiducial markers                                           |
| 21st Century Oncology                 | 8 Gy x 5                            | 100% of rx to cover 98% of PTV      | 2 mm isotropic expansion from prostate                                                                                                                   | 7-9 non-opposing coplanar fields                  | Real-time tracking of implanted electromagnetic beacons                                    |
| NCT00643994                           | 7·25 Gy x 5                         | 100% of rx to cover 95% of PTV      | 5 mm expansion from prostate, except 3 mm posteriorly. 2 cm of SVs included for int risk, same margins                                                   | Noncoplanar fields (robotic gantry)               | Real-time tracking of implanted fiducial markers                                           |
| NCT00643617                           | 9·5 Gy x 4                          | 100% of rx to cover 95% of PTV      | 2 mm expansion from prostate, except 0 mm posteriorly. 3 mm lateral extension for side(s) with Gleason 7 disease. 1 cm of SVs for int risk, same margins | Noncoplanar fields (robotic gantry)               | Real-time tracking of implanted fiducial markers                                           |
| Sunnybrook pHART 3                    | 7 Gy x 5                            | 95% of rx to cover 99% of PTV       | 4 mm isotropic expansion from prostate                                                                                                                   | "Step and shoot" intensity modulated radiotherapy | Orthogonal imaging to implanted fiducial markers prior to treatment                        |
| Sunnybrook pHART 6                    | 8 Gy x 5                            | 95% of rx to cover 99% of PTV       | 5 mm isotropic expansion from prostate                                                                                                                   | "Step and shoot" intensity modulated radiotherapy | Orthogonal imaging to implanted fiducial markers prior to treatment                        |
| Beth Israel Deaconess Medical Center  | 7·25 Gy x 5                         | 100% of rx to cover 95% of PTV      | 5 mm expansion from prostate, except 3 mm posteriorly                                                                                                    | Noncoplanar fields (robotic gantry)               | Real-time tracking of implanted fiducial markers                                           |
| University of California, Los Angeles | 8 Gy x 5                            | 100% of rx to cover 95% of PTV      | 5 mm expansion from prostate, except 3 mm posteriorly                                                                                                    | Volumetric modulated arc therapy                  | Orthogonal imaging to implanted fiducial markers prior to and three times during treatment |
| Genesis Healthcare                    | 9·5 Gy x 4                          | 100% of rx to cover 95% of PTV      | 2 mm expansion from prostate, except 0 mm posteriorly. 3 mm lateral                                                                                      | Noncoplanar fields (robotic gantry)               | Real-time tracking of implanted fiducial markers                                           |

|            |                                     |                                   |                                                                                                |                                     |                                                  |
|------------|-------------------------------------|-----------------------------------|------------------------------------------------------------------------------------------------|-------------------------------------|--------------------------------------------------|
|            |                                     |                                   | extension for side(s) with Gleason 7 disease. 1 cm of SVs for int risk, same margins           |                                     |                                                  |
| Georgetown | 7 Gy x 5 (33%)<br>7.25 Gy x 5 (67%) | 100% of rx to cover<br>95% of PTV | 5 mm expansion from prostate, except 3 mm posteriorly. Proximal SV up to bifurcation included. | Noncoplanar fields (robotic gantry) | Real-time tracking of implanted fiducial markers |

**eTable 2.** Selected Overview of Toxicity Scales for Grade  $\geq 3$  Toxicity Events

|                           | CTC 2.0                                                                                                                                                         | CTCAE v 3.0                                                                                                                                                                                                                                                       | CTCAE v4.0                                                                                                                                                                                                                                                           | RTOG (acute)                                                                        | RTOG (late)                                             |
|---------------------------|-----------------------------------------------------------------------------------------------------------------------------------------------------------------|-------------------------------------------------------------------------------------------------------------------------------------------------------------------------------------------------------------------------------------------------------------------|----------------------------------------------------------------------------------------------------------------------------------------------------------------------------------------------------------------------------------------------------------------------|-------------------------------------------------------------------------------------|---------------------------------------------------------|
| <b>Genitourinary</b>      |                                                                                                                                                                 |                                                                                                                                                                                                                                                                   |                                                                                                                                                                                                                                                                      |                                                                                     |                                                         |
| Urinary frequency/urgency |                                                                                                                                                                 | 3: $\geq 1$ x/hour; urgency; catheter indicated                                                                                                                                                                                                                   | No grade 3                                                                                                                                                                                                                                                           | 3: Frequency with urgency and nocturia hourly or more frequently                    | 3: Severe frequency & dysuria                           |
| Urinary retention         | 3: requiring frequent in/out catheterization ( $\geq 4$ x per week) or urological intervention (e.g., TURP, suprapubic tube, urethrotomy)<br>4: Bladder rupture | 3: More than daily catheterization indicated; urological intervention indicated (e.g., TURP, suprapubic tube, urethrotomy)<br>4: Life-threatening consequences; organ failure (e.g., bladder rupture); operative intervention requiring organ resection indicated | 3: Elective operative or radiologic intervention indicated; substantial loss of affected kidney function or mass<br>4: Life-threatening consequences; organ failure; urgent operative intervention indicated                                                         | 4: acute bladder obstruction not secondary to clot passage, ulceration, or necrosis |                                                         |
| Hematuria                 | 3: persistent gross bleeding or clots; may require catheterization or instrumentation, or transfusion<br>4: open surgery or necrosis or deep bladder ulceration | 3: Transfusion, interventional radiology, endoscopic, or operative intervention indicated; radiation therapy (i.e., hemostasis of bleeding site)<br>4: Life-threatening consequences; major urgent intervention indicated                                         | 3: Gross hematuria; transfusion, IV medications or hospitalization indicated; elective endoscopic, radiologic or operative intervention indicated; limiting self care ADL<br>4: Life-threatening consequences; urgent radiologic or operative intervention indicated | 3: gross hematuria with/without clot passage<br>4: Hematuria requiring transfusion  | 3: frequent hematuria<br>4: severe hemorrhagic cystitis |
| Stricture                 |                                                                                                                                                                 | 3: Symptomatic and altered organ function (e.g., sepsis or hydronephrosis, or renal dysfunction);                                                                                                                                                                 |                                                                                                                                                                                                                                                                      |                                                                                     |                                                         |

|                         |                                                                                                                                                                                     |                                                                                                                                                                                                                                                              |                                                                                                                                                                                                                                                 |                                                                                  |                                                                                                  |
|-------------------------|-------------------------------------------------------------------------------------------------------------------------------------------------------------------------------------|--------------------------------------------------------------------------------------------------------------------------------------------------------------------------------------------------------------------------------------------------------------|-------------------------------------------------------------------------------------------------------------------------------------------------------------------------------------------------------------------------------------------------|----------------------------------------------------------------------------------|--------------------------------------------------------------------------------------------------|
|                         |                                                                                                                                                                                     | operative intervention indicated<br>4: Life-threatening consequences; organ failure or operative intervention requiring organ resection indicated                                                                                                            |                                                                                                                                                                                                                                                 |                                                                                  |                                                                                                  |
| Incontinence            | 3: no control (in the absence of fistula)                                                                                                                                           | 3 Interfering with ADL; intervention indicated (e.g., clamp, collagen injections)<br>4: Operative intervention indicated (e.g., cystectomy or permanent urinary diversion)                                                                                   | 3: Intervention indicated (e.g., clamp, collagen injections); operative intervention indicated; limiting self care ADL                                                                                                                          |                                                                                  | 3: reduction in bladder capacity (<150 cc)<br>4: Necrosis/contracted bladder (capacity < 100 cc) |
| Other                   |                                                                                                                                                                                     |                                                                                                                                                                                                                                                              |                                                                                                                                                                                                                                                 | 3: dysuria, pelvis pain or bladder spasm requiring regular, frequent narcotic    | 3: severe telangiectasia (often with petechiae)                                                  |
| <b>Gastrointestinal</b> |                                                                                                                                                                                     |                                                                                                                                                                                                                                                              |                                                                                                                                                                                                                                                 |                                                                                  |                                                                                                  |
| Diarrhea                | 3: increase of $\geq 7$ stools/day or incontinence; or need for parenteral support for dehydration<br>4: physiologic consequences requiring intensive care; or hemodynamic collapse | 3: Increase of $\geq 7$ stools per day over baseline; incontinence; IV fluids $\geq 24$ hours; hospitalization; severe increase in ostomy output compared to baseline; interfering with ADL<br>4: Life-threatening consequences (e.g., hemodynamic collapse) | 3: Increase of $\geq 7$ stools per day over baseline; incontinence; hospitalization indicated; severe increase in ostomy output compared to baseline; limiting self care ADL<br>4: Life-threatening consequences; urgent intervention indicated | 3: Diarrhea requiring parenteral support                                         |                                                                                                  |
| Bleeding                | 3: requiring transfusion<br>4: catastrophic bleeding, requiring major nonelective intervention                                                                                      | 3: Interfering with ADL; interventional radiology, endoscopic, or operative intervention indicated                                                                                                                                                           | 3: Transfusion, radiologic, endoscopic, or elective operative intervention indicated                                                                                                                                                            | 3: Diarrhea requiring parenteral support<br>4: GI bleeding requiring transfusion | 3: Obstruction or bleeding, requiring surgery                                                    |

|         |                                    |                                                                                                                                                                                                          |                                                                                                                                                                                 |  |                                   |
|---------|------------------------------------|----------------------------------------------------------------------------------------------------------------------------------------------------------------------------------------------------------|---------------------------------------------------------------------------------------------------------------------------------------------------------------------------------|--|-----------------------------------|
|         |                                    | 4: Life-threatening consequences                                                                                                                                                                         | 4: Life-threatening consequences; urgent intervention indicated                                                                                                                 |  |                                   |
| Fistula | 3: present<br>4: requiring surgery | 3: Symptomatic and severely altered GI function (e.g., altered dietary habits, diarrhea, or GI fluid loss); IV fluids, tube feedings, or TPN indicated $\geq$ 24 hrs<br>4: Life-threatening consequences | 3: Severely altered GI function; TPN or hospitalization indicated; elective operative intervention indicated<br>4: Life-threatening consequences; urgent intervention indicated |  | 4: Necrosis / perforation fistula |

ADL, activity of daily living; CTC v2.0, common toxicity criteria version 2.0; CTCAE v3.0 or v4.0, common terminology criteria for adverse events; GI, gastrointestinal; RTOG, Radiation Therapy Oncology Group

**eTable 3.** Cumulative Incidence or Kaplan-Meier Estimates for Selected End Points

| Risk Group                                                                                     | 5-Year              | 7-Year              | 10-Year             |
|------------------------------------------------------------------------------------------------|---------------------|---------------------|---------------------|
| <b>Cumulative Incidence Estimate of Biochemical Recurrence (95% Confidence Interval)</b>       |                     |                     |                     |
| Low                                                                                            | 2.5% (1.5%-3.4%)    | 4.5% (3.2%-5.8%)    | 8.6% (5.9%-11.2%)   |
| Fav Int                                                                                        | 6.3% (4.4%-8.3%)    | 8.6% (6.2%-11.0%)   | 13.5% (7.9%-19.1%)  |
| Unfav Int                                                                                      | 9.6% (5.7%-13.5%)   | 14.9% (9.5%-20.2%)  | 18.9% (12.1%-25.7%) |
| All Intermediate                                                                               | 7.2% (5.5%-9.0%)    | 10.2% (8.0%-12.5%)  | 15.0% (10.3%-19.7%) |
| <b>Cumulative Incidence Estimate of Distant Metastasis (95% Confidence Interval)</b>           |                     |                     |                     |
| Low                                                                                            | 0.1% (0.0%-0.3%)    | 0.1% (0.0%-0.3%)    | 0.5% (0.0%-1.2%)    |
| Fav Int                                                                                        | 1.5% (0.5%-2.4%)    | 1.7% (0.6%-2.8%)    | 1.7% (0.6%-2.8%)    |
| Unfav Int                                                                                      | 1.8% (0.0%-3.6%)    | 3.0% (0.1%-5.8%)    | 3.0% (0.1%-5.8%)    |
| All Intermediate                                                                               | 1.6% (0.7%-2.4%)    | 2.0% (1.0%-3.0%)    | 2.0% (1.0%-3.0%)    |
| <b>Kaplan-Meier Estimate of Biochemical Recurrence-Free Survival (95% Confidence Interval)</b> |                     |                     |                     |
| Low                                                                                            | 92.2% (90.4%-93.6%) | 87.2% (85.0%-89.2%) | 79.6% (75.6%-83.0%) |
| Fav Int                                                                                        | 90.5% (87.8%-92.6%) | 85.4% (81.9%-88.2%) | 78.0% (71.2%-83.4%) |
| Unfav Int                                                                                      | 82.8% (77.3%-87.2%) | 74.3% (67.2%-80.1%) | 70.3% (62.0%-77.1%) |
| All Intermediate                                                                               | 88.4% (86.0%-90.4%) | 82.4% (79.3%-85.1%) | 75.8% (70.2%-80.4%) |
| <b>Kaplan-Meier Estimate of Overall Survival (95% Confidence Interval)</b>                     |                     |                     |                     |
| Low                                                                                            | 94.5% (93.0%-95.7%) | 91.4% (89.4%-93.0%) | 87.6% (84.5%-90.1%) |
| Fav Int                                                                                        | 96.7% (94.8%-97.9%) | 93.7% (91.0%-95.6%) | 91.0% (87.4%-93.6%) |
| Unfav Int                                                                                      | 92.0% (87.6%-94.8%) | 86.5% (80.6%-90.7%) | 86.5% (80.6%-90.7%) |
| All Intermediate                                                                               | 95.4% (93.7%-96.6%) | 91.7% (89.2%-93.6%) | 89.6% (86.6%-92.0%) |

Fav Int, favorable intermediate; Unfav Int, unfavorable intermediate

**eTable 4.** Competing Risk Regression Analysis for Predictors of Biochemical Recurrence

|                                                | Low Risk         |         | Favorable Intermediate Risk |                 | Unfavorable Intermediate-Risk       |                  |
|------------------------------------------------|------------------|---------|-----------------------------|-----------------|-------------------------------------|------------------|
|                                                | SHR (95% CI)     | p-value | SHR (95% CI)                | p-value         | SHR (95% CI)                        | p-value          |
| <b>Age</b>                                     | 1.00 (0.97-1.03) | 0.80    | 1.01 (0.99-1.03)            | 0.47            | 1.00 (0.98-1.03)                    | 0.77             |
| <b>T stage</b>                                 |                  |         |                             |                 |                                     |                  |
| <b>1c</b>                                      | Reference        |         | Reference                   |                 | Reference                           |                  |
| <b>2a</b>                                      | 0.79 (0.46-1.35) | 0.39    | 1.23 (0.62-2.45)            | 0.55            | <b>3.15 (1.22-8.13)</b>             | <b>0.02</b>      |
| <b>2b</b>                                      |                  |         | 1.45 (0.70-3.03)            | 0.32            | <b>4.92 (2.19-11.22)</b>            | <b>&lt;0.01</b>  |
| <b>2c</b>                                      |                  |         | <b>2.88 (1.31-6.34)</b>     | <b>&lt;0.01</b> | 2.54 (0.76-8.48)                    | 0.13             |
| <b>ln(initial PSA)</b>                         | 1.11 (0.42-2.95) | 0.83    | 1.98 (0.75-5.23)            | 0.17            | 1.10 (0.59-2.05)                    | 0.77             |
| <b>Gleason Grade group</b>                     |                  |         |                             |                 |                                     |                  |
| <b>I</b>                                       | Reference        |         | Reference                   |                 | Reference                           |                  |
| <b>II</b>                                      |                  |         | 0.78 (0.38-1.61)            | 0.5             | <b>46011.52 (7874.75-268841.64)</b> | <b>&lt;0.01.</b> |
| <b>III</b>                                     |                  |         |                             |                 | <b>47043.18 (9950.10-222415.82)</b> | <b>&lt;0.01</b>  |
| <b>EQD<sub>2</sub> (≤91 Gy vs. &gt;91 Gy)*</b> | 0.99 (0.96-1.01) | 0.30    | 1.03 (0.99-1.08)            | 0.18            | 0.94 (0.86-1.04)                    | 0.23             |
| <b>ADT Use</b>                                 | 1.03 (0.37-2.85) | 0.95    | 0.46 (0.17-1.27)            | 0.13            | 0.88 (0.70-1.10)                    | 0.26             |

\*Refers to the “equivalent dose in 2 Gy fractions”, and is calculated assuming an  $\alpha/\lambda$  ratio of 1.5. 7.25 Gy in 5 fractions delivers an EQD<sub>2</sub> of ~91 Gy. 95% CI, 95% confidence interval; ADT, androgen deprivation therapy; EQD<sub>2</sub>, equivalent dose in 2 Gy fractions; SHR, subdistribution hazard ratio



**eTable 5.** Cox Proportional Hazards Regression Analysis for Predictors of Biochemical Recurrence

|                                                | Low Risk         |         | Favorable Intermediate Risk |         | Unfavorable Intermediate-Risk |                 |
|------------------------------------------------|------------------|---------|-----------------------------|---------|-------------------------------|-----------------|
|                                                | HR (95% CI)      | p-value | HR (95% CI)                 | p-value | HR (95% CI)                   | p-value         |
| <b>Age</b>                                     | 1.00 (0.96-1.03) | 0.94    | 1.01 (0.97-1.05)            | 0.57    | 1.01 (0.97-1.06)              | 0.62            |
| <b>T stage</b>                                 |                  |         |                             |         |                               |                 |
| <b>1c</b>                                      | Reference        |         | Reference                   |         | Reference                     |                 |
| <b>2a</b>                                      | 0.79 (0.35-1.78) | 0.57    | 1.25 (0.55-2.85)            | 0.59    | <b>3.40 (1.40-8.27)</b>       | <b>&lt;0.01</b> |
| <b>2b</b>                                      |                  |         | 1.50 (0.52-4.35)            | 0.46    | <b>4.48 (1.22-16.40)</b>      | <b>0.02</b>     |
| <b>2c</b>                                      |                  |         | 2.75 (0.27-27.99)           | 0.39    | 4.39 (0.43-44.40)             | 0.21            |
| <b>ln(initial PSA)</b>                         | 1.15 (0.65-2.05) | 0.63    | 1.96 (0.93-4.14)            | 0.08    | 1.16 (0.56-2.40)              | 0.69            |
| <b>Gleason Grade group</b>                     |                  |         |                             |         |                               |                 |
| <b>I</b>                                       | Reference        |         | Reference                   |         | Reference                     |                 |
| <b>II</b>                                      |                  |         | 0.77 (0.37-1.60)            | 0.48    | >100000 (0-Inf)               | 1.00            |
| <b>III</b>                                     |                  |         |                             |         | >100000 (0-Inf)               | 1.00            |
| <b>EQD<sub>2</sub> (≤91 Gy vs. &gt;91 Gy)*</b> | 0.99 (0.92-1.06) | 0.74    | 1.03 (0.96-1.11)            | 0.38    | 0.94 (0.86-1.02)              | 0.14            |
| <b>ADT Use</b>                                 | 1.02 (0.31-3.41) | 0.97    | 0.48 (0.11-2.06)            | 0.32    | 0.96 (0.31-2.97)              | 0.94            |

\*Refers to the “equivalent dose in 2 Gy fractions”, and is calculated assuming an  $\alpha/\beta$  ratio of 1.5. 7.25 Gy in 5 fractions delivers an EQD<sub>2</sub> of ~91 Gy. 95% CI, 95% confidence interval; ADT, androgen deprivation therapy; EQD<sub>2</sub>, equivalent dose in 2 Gy fractions; HR, hazard ratio

**eTable 6.** Narrative Description of Severe Grade  $\geq 3$  Toxicity Outcomes

| <b>ACUTE URINARY TOXICITIES</b>                                                                                      |
|----------------------------------------------------------------------------------------------------------------------|
| <b><i>Frequency (8)</i></b>                                                                                          |
| Grade 3 frequency at one month, which resolved but recurred at 21 months.                                            |
| Grade 3 frequency at one month.                                                                                      |
| Grade 3 frequency at one month.                                                                                      |
| Grade 3 frequency at one month.                                                                                      |
| Grade 3 frequency at one month. Had cystoscopic evaluation prior to SBRT                                             |
| Grade 3 frequency at one month.                                                                                      |
| Grade 3 frequency at one month, which resolved but recurred at six months.                                           |
| Grade 3 frequency at one month, which resolved but recurred at six months. Had cystoscopic evaluation prior to SBRT. |
| <b><i>Retention (4)</i></b>                                                                                          |
| Grade 3 retention after first fraction requiring temporary indwelling catheter.                                      |
| Grade 3 retention after second fraction requiring temporary indwelling catheter.                                     |
| Grade 3 retention at two weeks requiring temporary indwelling catheter.                                              |
| Grade 3 retention at one month requiring temporary indwelling catheter.                                              |
| <b><i>Hematuria (1)</i></b>                                                                                          |
| Gross hematuria 1 month after SBRT. Cystoscopy at two months showed urethritis.                                      |
| <b>LATE URINARY TOXICITIES</b>                                                                                       |
| <b><i>Frequency (4)</i></b>                                                                                          |
| Grade 3 frequency and dysuria at 6 months. Had cystoscopic evaluation prior to SBRT                                  |
| Grade 3 frequency at 6 months. Had cystoscopic evaluation prior to SBRT.                                             |
| Grade 3 frequency at 6 months.                                                                                       |
| Grade 3 frequency at 21 months.                                                                                      |
| <b><i>Retention (17)</i></b>                                                                                         |
| Grade 3 retention at 12 months, treated with TURP                                                                    |
| Grade 3 retention at 12 months, treated with TURP                                                                    |
| Grade 3 retention at 14 months, treated with TURP                                                                    |
| Grade 3 retention at 16 months, treated with TURP                                                                    |
| Grade 3 retention at 17 months, treated with TURP                                                                    |
| Grade 3 retention at 18 months, treated with TURP                                                                    |
| Grade 3 retention at 18 months, treated with TURP                                                                    |
| Grade 3 retention at 20 months, treated with TURP                                                                    |
| Grade 3 retention at 32 months, treated with TURP                                                                    |

|                                                                                                                                                                                                     |
|-----------------------------------------------------------------------------------------------------------------------------------------------------------------------------------------------------|
| Grade 3 retention at 38 months, treated at 42 months with direct visual internal urethrotomy for bladder neck contracture.                                                                          |
| Grade 3 retention at 44 months, treated with TURP                                                                                                                                                   |
| Grade 3 retention at 50 months, treated with TURP                                                                                                                                                   |
| Grade 3 retention at 68 months, treated with TURP                                                                                                                                                   |
| Grade 3 retention at 69 months, treated with TURP                                                                                                                                                   |
| Grade 3 retention at 77 months, treated with TURP                                                                                                                                                   |
| Grade 3 retention at 84 months, treated with TURP                                                                                                                                                   |
| Grade 3 retention at 89 months, treated with TURP                                                                                                                                                   |
| <b><i>Hematuria (12)</i></b>                                                                                                                                                                        |
| Grade 3 hematuria at 6 months.                                                                                                                                                                      |
| Grade 3 hematuria at 12 months. Found to have stricture on cystoscopy. <sup>x1</sup>                                                                                                                |
| Grade 3 hematuria at 18 months.                                                                                                                                                                     |
| Grade 3 hematuria, cauterized at 18 months.                                                                                                                                                         |
| Grade 3 hematuria at 18 months. Found on cystoscopy to have a papillary bladder tumor.                                                                                                              |
| Grade 3 hematuria at 24 months, treated with laser coagulation.                                                                                                                                     |
| Grade 3 hematuria at 24 months, treated with laser coagulation.                                                                                                                                     |
| Grade 3 hematuria at 25 months.                                                                                                                                                                     |
| Grade 3 hematuria at 49 months later, also needed dilation of stricture at 72 months. <sup>x2</sup>                                                                                                 |
| Grade 3 hematuria at 72 months.                                                                                                                                                                     |
| Grade 3 hematuria at 75 months.                                                                                                                                                                     |
| Grade 3 hematuria at 108 months.                                                                                                                                                                    |
| <b><i>Stricture (7)</i></b>                                                                                                                                                                         |
| Grade 3 hematuria at 12 months. Found to have stricture on cystoscopy. <sup>x1</sup>                                                                                                                |
| Developed urethral stricture at 24 months.                                                                                                                                                          |
| Developed urethral stricture at 24 months. Subsequently underwent biopsy for suspected local recurrence at 36 months and developed incontinence. Biopsy did confirm local recurrence. <sup>x3</sup> |
| Developed stricture at 42 months.                                                                                                                                                                   |
| Developed urethral stricture at 52 months, which was dilated. Subsequently developed grade 4 hemorrhagic cystourethritis 1 month after dilation. <sup>x4</sup>                                      |
| Dilation of stricture at 72 months, also had gross hematuria at 49 months. <sup>x2</sup>                                                                                                            |

|                                                                                                                                                                                                                                                  |
|--------------------------------------------------------------------------------------------------------------------------------------------------------------------------------------------------------------------------------------------------|
| Found to have urethral stricture in membranous urethra on cystoscopy done at 76 months; also had hypotonic bladder from poorly controlled diabetes mellitus.                                                                                     |
| <b><i>Incontinence (4)</i></b>                                                                                                                                                                                                                   |
| Urge incontinence at 12 months, needed artificial sphincter.                                                                                                                                                                                     |
| Developed urethral stricture at 24 months. Subsequently underwent biopsy for suspected local recurrence at 36 months and developed incontinence. Biopsy did confirm local recurrence. <sup>x3</sup>                                              |
| Overflow incontinence at 27 months, ultimately leading to urethral dilation and ultimately a dorsal slit with bladder neck incision at 39 months.                                                                                                |
| Urge incontinence at 84 months, needed artificial sphincter.                                                                                                                                                                                     |
| <b><i>Other Severe Toxicities (2)</i></b>                                                                                                                                                                                                        |
| Bladder neck necrosis                                                                                                                                                                                                                            |
| Hemorrhagic cystourethritis one month after dilation of stricture, which took place 52 months after SBRT. <sup>x4</sup>                                                                                                                          |
| <b><i>Toxicities After Salvage Procedures (3)</i></b>                                                                                                                                                                                            |
| Developed local recurrence at 36 months and underwent salvage RP at 38 months. Immediately after this, had significant incontinence and developed a bladder neck contraction requiring bladder neck incision and artificial sphincter placement. |
| Developed local recurrence at 52 months and underwent salvage HDR at 60 months. Developed prostatic abscess and subsequent urinary incontinence.                                                                                                 |
| Developed local recurrence at 54 months and had salvage LDR at 58 months. Stricture developed 50 months later (i.e., 108 months after SBRT)                                                                                                      |
| <b>ACUTE GI TOXICITIES</b>                                                                                                                                                                                                                       |
| <b><i>Diarrhea (2)</i></b>                                                                                                                                                                                                                       |
| Grade 3 diarrhea at week 2                                                                                                                                                                                                                       |
| Grade 3 diarrhea at week 2                                                                                                                                                                                                                       |
| <b>LATE GI TOXICITIES</b>                                                                                                                                                                                                                        |
| <b><i>Bleeding (5)</i></b>                                                                                                                                                                                                                       |
| Grade 3 hematochezia at 6 months, treated with argon plasma coagulation.                                                                                                                                                                         |
| Grade 3 hematochezia at 6 months, treated with argon plasma coagulation.                                                                                                                                                                         |
| Grade 3 hematochezia at 30 months, treated with argon plasma coagulation. Continued to have bleeding, and ultimately underwent hemicolectomy, which identified a colonic adenocarcinoma.                                                         |
| Grade 3 hematochezia at 34 months, treated with formalin.                                                                                                                                                                                        |
| Grade 3 hematochezia at 49 months, treated with argon plasma coagulation.                                                                                                                                                                        |
| <b><i>Fistula (1)</i></b>                                                                                                                                                                                                                        |
| Developed a fistula in ano at 9 months. Had a history of diverticulitis, for which he had refused management on prior occasions.                                                                                                                 |
| <b><i>Other Severe Toxicities (1)</i></b>                                                                                                                                                                                                        |

|                                                                                                                                                                                                                            |
|----------------------------------------------------------------------------------------------------------------------------------------------------------------------------------------------------------------------------|
| Had history of ulcerative colitis and known dysplastic polyp near the sigmoid colon prior to SBRT. Had hematochezia at 24 months, and was found to have a colon cancer arising in this polyp, requiring a proctocolectomy. |
| <b><i>Toxicities After Salvage Procedures (1)</i></b>                                                                                                                                                                      |
| Developed local recurrence 65 months after SBRT and underwent salvage HDR at 69 months. Developed prostatic abscess and then a rectoprostatic fistula 6 months later (75 months after SBRT).                               |

<sup>1-4</sup>Footnotes intended to track patients who had multiple toxicity events (i.e., both entries followed by footnote "1" refer to the same

**eTable 7.** Multivariable Logistic Regression for Predictors of Late Composite RTOG/CTCAE Grade  $\geq 3$  Toxicity

| <b>Parameter</b>                                                         | <b>Odds Ratio (95% CI)</b> | <b>p-value</b>  |
|--------------------------------------------------------------------------|----------------------------|-----------------|
| EQD <sub>2</sub> ( $\leq 91$ Gy vs. $>91$ Gy)*                           | 0.99 (0.98-1.01)           | 0.41            |
| Fractionation (every other day versus daily)**                           | 0.54 (0.21-1.38)           | 0.20            |
| Treatment Platform (gantry-mounted linear accelerator versus CyberKnife) | 1.06 (0.33-3.38)           | 0.93            |
| Acute Composite RTOG/CTCAE Grade $\geq 3$ toxicity                       | <b>19.42 (5.14-73.42)</b>  | <b>&lt;0.01</b> |

\*Refers to the “equivalent dose in 2 Gy fractions”, and is calculated assuming an  $\alpha/\beta$  ratio of 1.5. 7.25 Gy in 5 fractions delivers an EQD<sub>2</sub> of  $\sim 91$  Gy.

\*\*Weekly fractionation was not included because the data came from a single center  
95% CI, 95% confidence interval

**eTable 8.** Multivariable Logistic Regression for Predictors of Late Composite RTOG/CTCAE Grade  $\geq 2$  Toxicity

| <b>Parameter</b>                                          | <b>Odds Ratio (95% CI)</b> | <b>p-value</b>  |
|-----------------------------------------------------------|----------------------------|-----------------|
| EQD <sub>2</sub> ( $\leq 91$ Gy vs. $>91$ Gy)*            | 1.00 (0.98-1.03)           | 0.76            |
| Fractionation (every other day versus daily)**            | <b>0.38 (0.16-0.89)</b>    | <b>0.03</b>     |
| Treatment Platform (linear accelerator versus CyberKnife) | 1.39 (0.25-7.93)           | 0.71            |
| Acute Composite RTOG/CTCAE Grade $\geq 2$                 | <b>3.15 (1.96-5.07)</b>    | <b>&lt;0.01</b> |

\*Refers to the “equivalent dose in 2 Gy fractions”, and is calculated assuming an  $\alpha/\beta$  ratio of 1.5. 7.25 Gy in 5 fractions delivers an EQD<sub>2</sub> of  $\sim 91$  Gy.

\*\*Weekly fractionation was not included because the data came from a single center  
95% CI, 95% confidence interval

**eTable 9.** Comparative Analysis of Efficacy and Safety of Radiation Treatment Options for Low- and Intermediate-Risk Prostate Cancer: An Analysis of Prospective Data With Long-term Follow-up

| Study                                                          | Number of Patients | Dose                          | Risk Groups                                   | Median Follow-up (Years) | Biochemical Control Endpoint                                                                                                                                     | Acute GU Toxicity              | Acute GI Toxicity               | Late GU Toxicity                   | Late GI Toxicity                        |
|----------------------------------------------------------------|--------------------|-------------------------------|-----------------------------------------------|--------------------------|------------------------------------------------------------------------------------------------------------------------------------------------------------------|--------------------------------|---------------------------------|------------------------------------|-----------------------------------------|
| <b>SBRT</b>                                                    |                    |                               |                                               |                          |                                                                                                                                                                  |                                |                                 |                                    |                                         |
| Present Study                                                  | 2142               | 33.5-40 Gy in 4-5 fractions   | 56.0% Low<br>31.5% Fav Int<br>12.5% Unfav Int | 6.9                      | <u>5-year BCR</u><br>2.5% Low<br>6.3% Fav Int<br>9.6% Unfav Int<br>7.2% Int<br><br><u>7-year BCR</u><br>4.5% Low<br>8.6% Fav Int<br>14.9% Unfav Int<br>10.2% Int | RTOG/CTCAE<br>3: 0.6%<br>4: 0% | RTOG/CTCAE<br>3: 0.09%<br>4: 0% | RTOG/CTCAE<br>3: 2.1%<br>4: 0.05%  | RTOG/CTCAE<br>3: 0.4%<br>4: 0%          |
| <b>Conventional Fractionation</b>                              |                    |                               |                                               |                          |                                                                                                                                                                  |                                |                                 |                                    |                                         |
| RTOG 0126, high dose arm <sup>1</sup>                          | 728-736*           | 79.2 Gy (34.4% IMRT)          | 100% Int                                      | 8.4                      | 5-year BCR: 13%<br>8-year BCR: 20%                                                                                                                               | CTC v2.0<br>3: 1%              | CTC v2.0<br>3: <1%              | RTOG/EORTC<br>3: 3%<br>4: <1%      | RTOG/EORTC<br>3: 5%<br>4: <1%<br>5: <1% |
| PROFIT, conventional arm <sup>2</sup>                          | 598                | 78 Gy (most with IMRT)        | 100% Int                                      | 6.0                      | 5-year BCRFS 85%                                                                                                                                                 | RTOG<br>3: 4.0%<br>4: 0%       | RTOG<br>3: 0.5%<br>4: 0%        | RTOG<br>3: 2.8%<br>4: 0.2%         | RTOG<br>3: 2.7%<br>4: 0.2%              |
| RTOG 0415, conventional arm <sup>3</sup>                       | 542                | 73.8 Gy (IMRT in 78.7%)       | 100% Low                                      | 5.8                      | 5-year BCR: 8.1%                                                                                                                                                 | RTOG<br>3: 2.4%<br>4: 0%       | RTOG<br>3: 0.6%<br>4: 0%        | RTOG<br>3: 2.1%<br>4: 0.2%         | RTOG<br>3: 2.4%<br>4: 0.2%              |
| CHHiP, conventional arm <sup>4</sup>                           | 1065               | 74 Gy                         | 15% Low<br>73% Int<br>12% High                | 5.2                      | 5-year BCRFS: 88.3%                                                                                                                                              |                                |                                 | RTOG<br>3: 3%                      | RTOG<br>3: 2%                           |
| <b>LDR Brachytherapy as Monotherapy</b>                        |                    |                               |                                               |                          |                                                                                                                                                                  |                                |                                 |                                    |                                         |
| RTOG 0232, LDR arm <sup>5</sup>                                | 292                | 125-145 Gy                    | 100% Int                                      | 6.7                      | 5-year FFP: 85.6%                                                                                                                                                | CTC v2.0<br>3: 5%<br>4: 0%     | CTC v 2.0<br>3: 1%<br>4: 0%     | RTOG/EORTC<br>3: 3%<br>4: 1%       | RTOG/EORTC<br>3: 1%<br>4: <1%           |
| MD Anderson Cancer Center <sup>6</sup>                         | 300                | 115-145 Gy                    | 100% Int                                      | 5.1                      | 5-year BCRFS: 92.7%                                                                                                                                              |                                |                                 | CTCAE v 4.0<br>3: 1.3%             | CTCAE v 4.0<br>3: 0.6%                  |
| <b>HDR Brachytherapy Monotherapy</b>                           |                    |                               |                                               |                          |                                                                                                                                                                  |                                |                                 |                                    |                                         |
| Seville <sup>7</sup>                                           | 119                | 13.5 Gy in 2 fractions        | 71% Low<br>29% Int                            | 4.4                      | Actuarial FFBCR 98%                                                                                                                                              | CTCAE v3.0<br>3: 2%            | CTCAE v3.0<br>3: 0%             | CTCAE v3.0<br>3: 1%                | CTCAE v3.0<br>3: 0                      |
| <b>Conventional Fractionation with LDR Brachytherapy Boost</b> |                    |                               |                                               |                          |                                                                                                                                                                  |                                |                                 |                                    |                                         |
| RTOG 0232, LDR boost arm <sup>5</sup>                          | 287                | 45 Gy + 100-110 Gy (43% IMRT) | 100% Int                                      | 6.7                      | 5-year FFP: 84.5%                                                                                                                                                | CTCAE v2.0<br>3: 5%<br>4: 0%   | CTCAE v 2.0<br>3: <1%<br>4: <1% | RTOG/EORTC<br>3: 7%<br>4: <1%      | RTOG/EORTC<br>3: 2%<br>4: 0%            |
| ASCENDE-RT, LDR boost arm <sup>8,9</sup>                       | 198                | 46 Gy + 115 (0% IMRT)         | 29.8% Int<br>70.2% High                       | 6.5                      | 5-year BCRFS: 88.7%<br>7-year BCRFS: 86.2%                                                                                                                       | LENT/SOMA<br>3: 2.5%           | LENT/SOMA<br>3: 0%              | LENT/SOMA<br>3: 18.4%<br>4-5: 2.1% | LENT/SOMA<br>3: 8.1%<br>4-5: 1.0%       |



| <b>Conventional Fractionation with HDR Brachytherapy Boost</b> |      |                                                 |                                |     |                                     |                          |                            |                                         |                            |
|----------------------------------------------------------------|------|-------------------------------------------------|--------------------------------|-----|-------------------------------------|--------------------------|----------------------------|-----------------------------------------|----------------------------|
| Mt Vernon Trial, HDR boost arm <sup>10</sup>                   | 110  | 35.75 Gy in 13 fractions + 8.5 Gy x 2 (0% IMRT) | 2% Low<br>44% Int<br>54% High  | 7.1 | 7-year FFBCR<br>66% Int<br>46% High |                          |                            | Dische<br>7-year urethral stricture: 8% |                            |
| <b>Moderate Hypofractionation</b>                              |      |                                                 |                                |     |                                     |                          |                            |                                         |                            |
| PROFIT, hypofractionated arm <sup>2</sup>                      | 608  | 60 Gy in 20 fractions                           | 100% Int                       | 6.0 | 5-year BCRFS: 85%                   | RTOG<br>3: 3.9%<br>4: 0% | RTOG<br>3: 0.7%<br>4: 0%   | RTOG<br>3: 1.5%<br>4: 0%                | RTOG<br>3: 2.7%<br>4: 0.2% |
| RTOG 0415, hypofractionated arm <sup>3</sup>                   | 550  | 70 Gy in 28 fractions (IMRT in 79.6%)           | 100% Low                       | 5.8 | 5-year BCR: 6.3%                    | RTOG<br>3: 3.3%<br>4: 0% | RTOG<br>3: 0.6%<br>4: 0.2% | RTOG<br>3: 3.5%<br>4: 0.0%              | RTOG<br>3: 4.1%<br>4: 0.0% |
| ChHIP, hypofractionated arm <sup>4</sup>                       | 1074 | 60 Gy in 20 fractions                           | 15% Low<br>73% Int<br>12% High | 5.2 | 5-year BCFFS: 90.6%                 |                          |                            | RTOG<br>3: 6%                           | RTOG<br>3: 3%              |

BCFFS, biochemical-clinical failure-free survival; BCR, biochemical recurrence; BCRFS, biochemical recurrence-free survival; CET, California Endocurie Therapy; CTC v2.0, common toxicity criteria version 2.0; CTCAE v3.0 or v4.0, common terminology criteria for adverse events; EORTC, European Organization for Research and Treatment of Cancer; FFBCR, freedom from biochemical recurrence; FFP, freedom from progression; HDR, high dose rate brachytherapy; IMRT, intensity modulated radiotherapy; LDR, low dose rate brachytherapy; LENT, late effects of normal tissue; RTOG, radiation therapy oncology group; TURP, transurethral resection of the prostate; SBRT, stereotactic body radiotherapy

## eReferences

1. Michalski JM, Moughan J, Purdy J, et al. Effect of Standard vs Dose-Escalated Radiation Therapy for Patients With Intermediate-Risk Prostate Cancer: The NRG Oncology RTOG 0126 Randomized Clinical Trial. *JAMA oncology* 2018.
2. Catton CN, Lukka H, Gu CS, et al. Randomized Trial of a Hypofractionated Radiation Regimen for the Treatment of Localized Prostate Cancer. *Journal of clinical oncology : official journal of the American Society of Clinical Oncology* 2017; **35**(17): 1884-90.
3. Lee WR, Dignam JJ, Amin MB, et al. Randomized Phase III Noninferiority Study Comparing Two Radiotherapy Fractionation Schedules in Patients With Low-Risk Prostate Cancer. *Journal of clinical oncology : official journal of the American Society of Clinical Oncology* 2016; **34**(20): 2325-32.
4. Dearnaley D, Syndikus I, Mossop H, et al. Conventional versus hypofractionated high-dose intensity-modulated radiotherapy for prostate cancer: 5-year outcomes of the randomised, non-inferiority, phase 3 CHHiP trial. *The Lancet Oncology* 2016; **17**(8): 1047-60.
5. Prestidge BR, Winter K, Sanda MG, et al. Initial Report of NRG Oncology/RTOG 0232: A Phase 3 Study Comparing Combined External Beam Radiation and Transperineal Interstitial Permanent Brachytherapy With Brachytherapy Alone for Selected Patients With Intermediate-Risk Prostatic Carcinoma. *International Journal of Radiation Oncology • Biology • Physics* 2016; **96**(2): S4.
6. Frank SJ, Pugh TJ, Blanchard P, et al. Prospective Phase 2 Trial of Permanent Seed Implantation Prostate Brachytherapy for Intermediate-Risk Localized Prostate Cancer: Efficacy, Toxicity, and Quality of Life Outcomes. *International journal of radiation oncology, biology, physics* 2018; **100**(2): 374-82.
7. Nagore G, Lopez Guerra JL, Kruminia E, et al. High dose rate brachytherapy for prostate cancer: A prospective toxicity evaluation of a one day schedule including two 13.5Gy fractions. *Radiotherapy and oncology : journal of the European Society for Therapeutic Radiology and Oncology* 2018; **127**(2): 219-24.
8. Morris WJ, Tyldesley S, Rodda S, et al. Androgen Suppression Combined with Elective Nodal and Dose Escalated Radiation Therapy (the ASCENDE-RT Trial): An Analysis of Survival Endpoints for a Randomized Trial Comparing a Low-Dose-Rate Brachytherapy Boost to a Dose-Escalated External Beam Boost for High- and Intermediate-risk Prostate Cancer. *International journal of radiation oncology, biology, physics* 2017; **98**(2): 275-85.
9. Rodda S, Tyldesley S, Morris WJ, et al. ASCENDE-RT: An Analysis of Treatment-Related Morbidity for a Randomized Trial Comparing a Low-Dose-Rate Brachytherapy Boost with a Dose-Escalated External Beam Boost for High- and Intermediate-Risk Prostate Cancer. *International journal of radiation oncology, biology, physics* 2017; **98**(2): 286-95.
10. Hoskin PJ, Rojas AM, Bownes PJ, Lowe GJ, Ostler PJ, Bryant L. Randomised trial of external beam radiotherapy alone or combined with high-dose-rate brachytherapy boost for localised prostate cancer. *Radiotherapy and oncology : journal of the European Society for Therapeutic Radiology and Oncology* 2012; **103**(2): 217-22.
